# Supplementary material for: Soil greenhouse gas fluxes in corn systems with varying agricultural practices and pesticide levels
Source: Royal Society of Chemistry journal article supplement (doi:10.1039/d4va00105b), 2024-01-01
Supplement: d4va00105b1.pdf [file d4va00105b1.pdf]

Supplementary Material

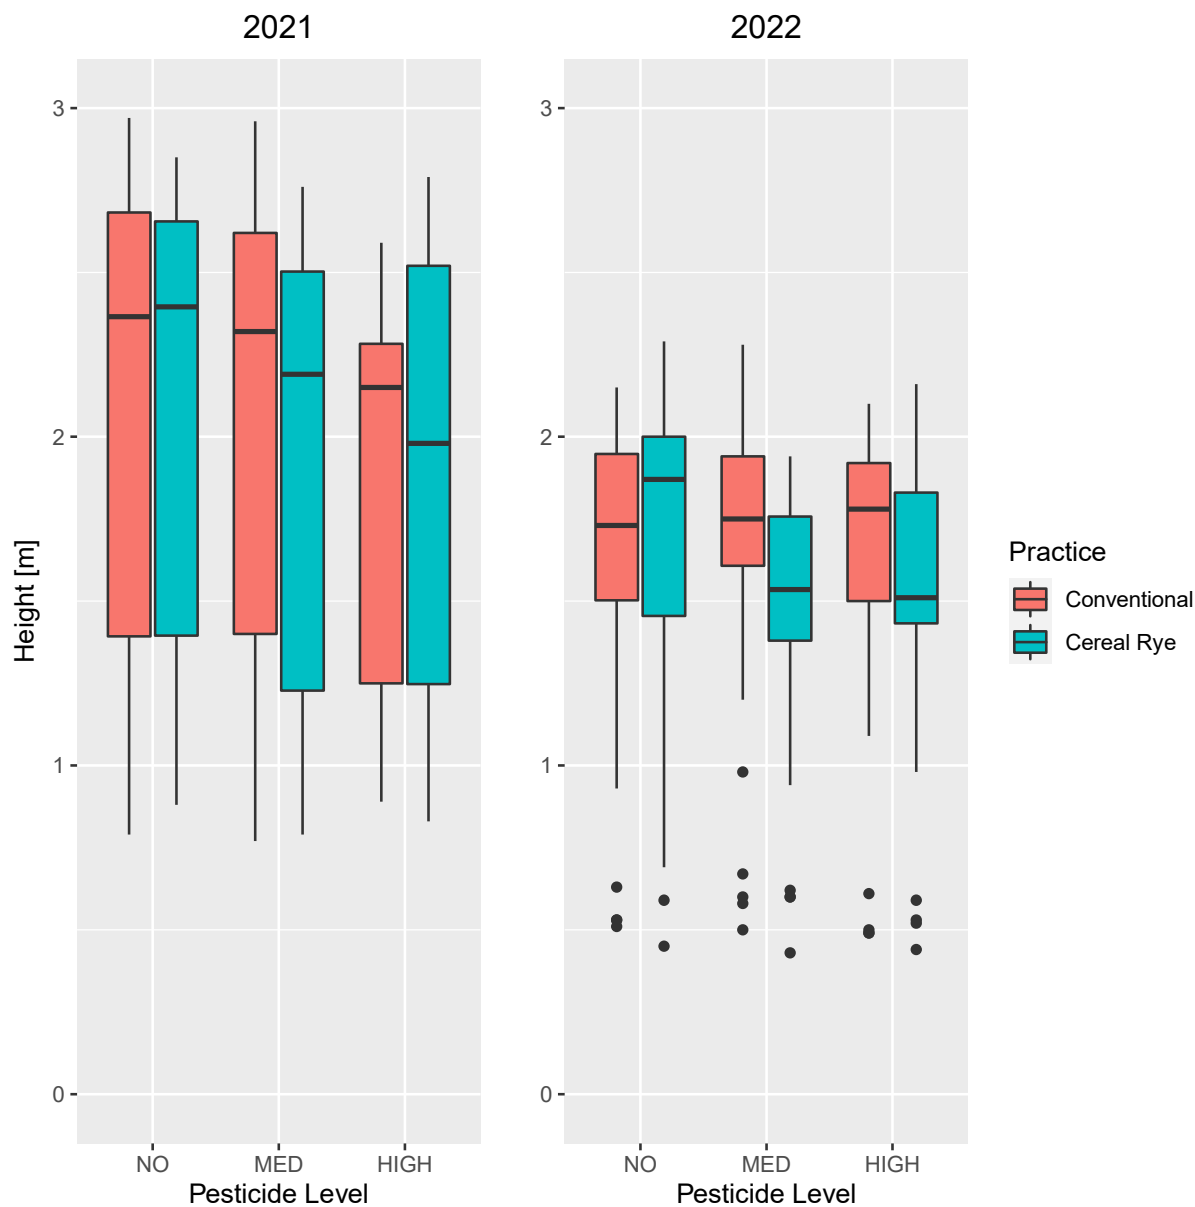

Figure 1. Corn height [m] in 2021 (left) and 2022 (right) for conventional plots (red); and for cereal rye cover crop plots (green).

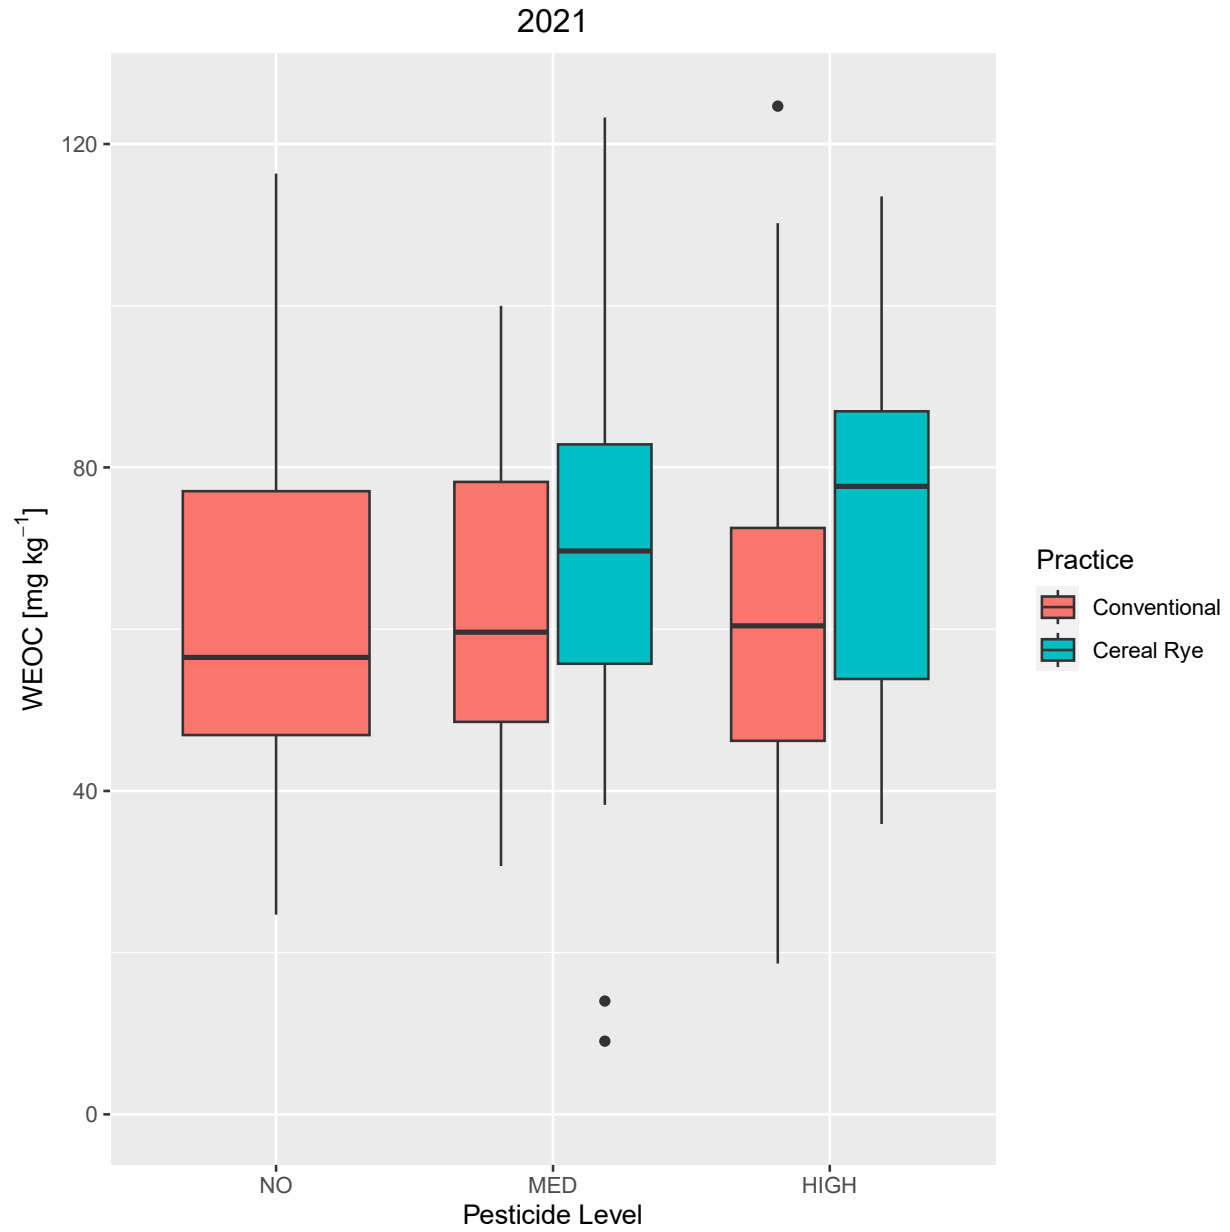

Figure 2. WEOC in non-directly fertilized plots for each type of agricultural practices (conventional in red and cereal rye in green) and pesticide input levels (no, med, and high) in 2021

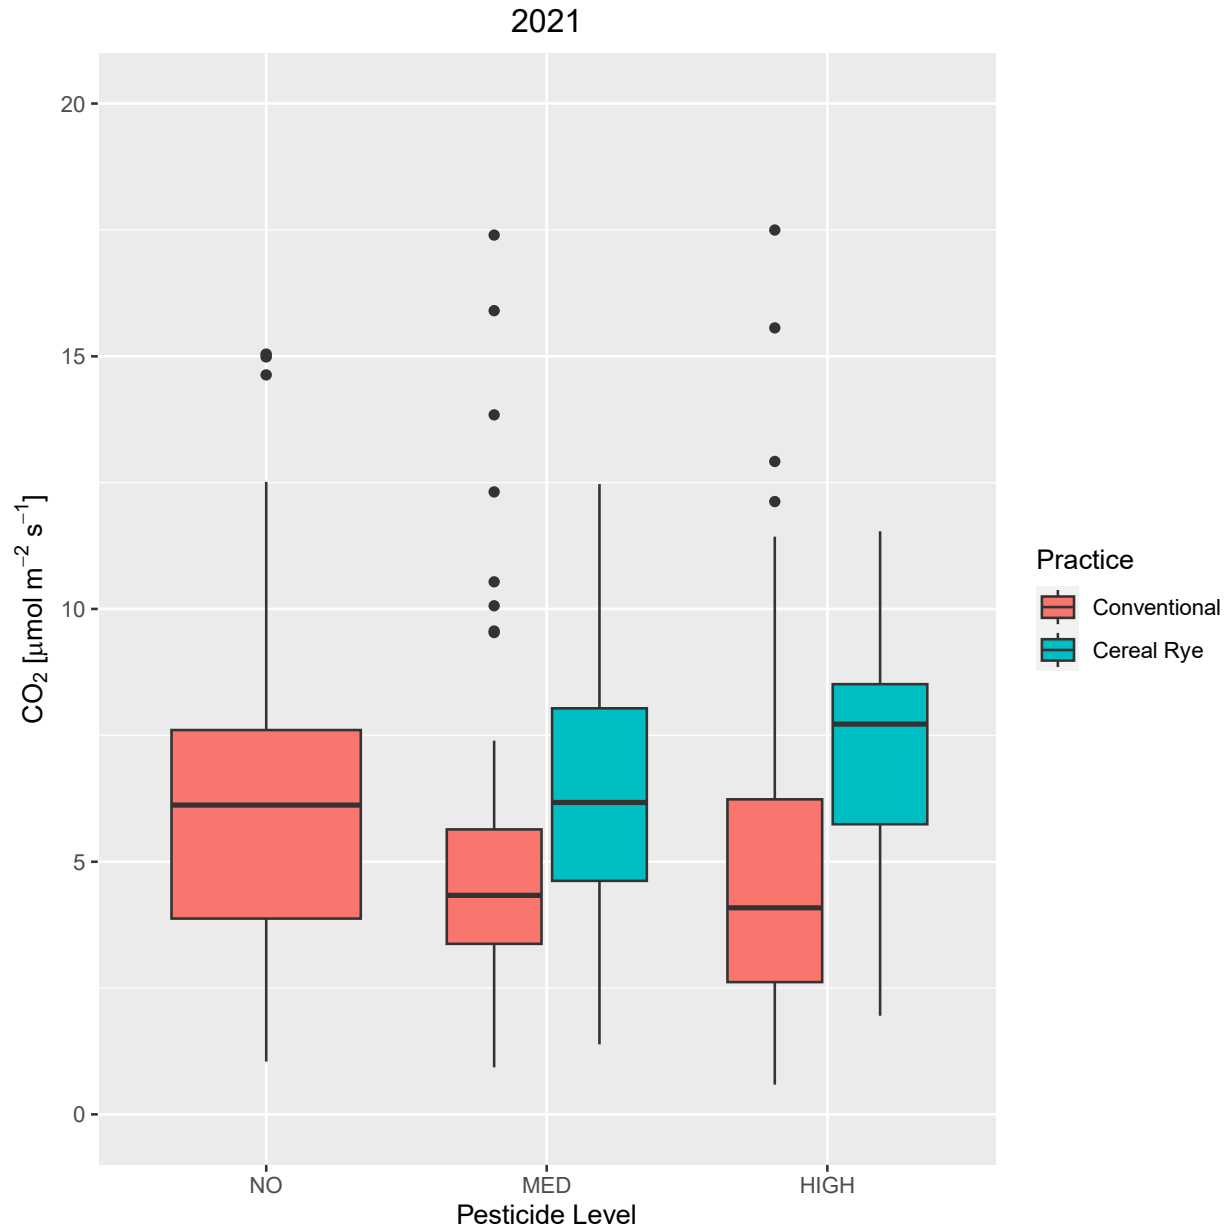

Figure 3. Soil CO<sub>2</sub> fluxes in non-directly fertilized plots for each type of agricultural practices (conventional in red and cereal rye in green) and pesticide input levels (no, med, and high) in 2021

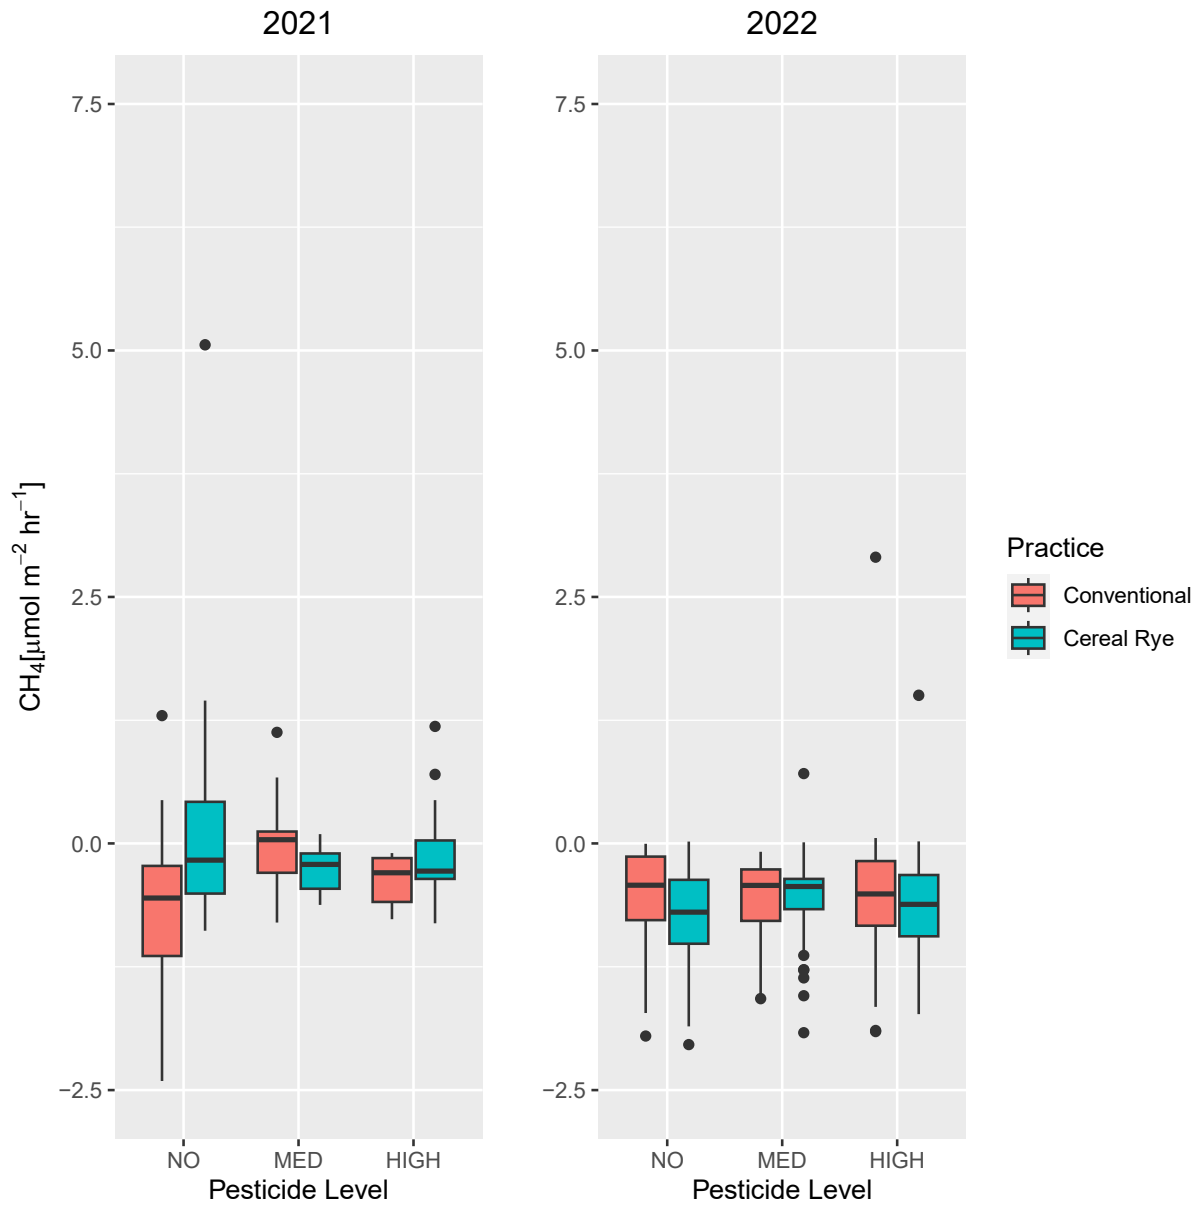

Figure 4. Soil CH<sub>4</sub> fluxes in directly fertilized plots excluding Plot 202 for each type of agricultural practices (conventional in red and cereal rye in green) and pesticide input levels (no, med, and high) in 2021
